# Supplementary material for: Substituent effects on BTP's basicity and complexation properties with LnIIIlanthanide ions
Source: Royal Society of Chemistry journal article supplement (doi:10.1039/c0nj00527d), 2010-10-11
Supplement: c0nj00527d.pdf [file c0nj00527d.pdf]

## Supplementary materials :

| R                | Pyr gas   | PyrH <sup>+</sup> gas | Pyr PCM   | PyrH <sup>+</sup> PCM | Me <sub>4</sub> BTP gas | Me <sub>4</sub> BTPH <sup>+</sup> gas | Me <sub>4</sub> BTP PCM | Me <sub>4</sub> BTPH <sup>+</sup> PCM |
|------------------|-----------|-----------------------|-----------|-----------------------|-------------------------|---------------------------------------|-------------------------|---------------------------------------|
| Cl               | -707.8868 | -708.2556             | -707.8951 | -708.3551             | -1423.4547              | -1423.8673                            | -1423.4556              | -1423.9119                            |
| F                | -347.5251 | -347.8951             | -347.5334 | -347.9956             | -1063.0932              | -1063.5072                            | -1063.0971              | -1063.5552                            |
| H                | -248.2926 | -248.6681             | -248.3037 | -248.7666             | -963.8608               | -964.2791                             | -963.8666               | -964.3277                             |
| Me               | -287.6146 | -287.9972             | -287.6228 | -288.0898             | -1003.1827              | -1003.6057                            |                         | -1003.6465                            |
| <sup>t</sup> But | -405.5604 | -405.9469             | -405.5682 | -406.0350             | -1121.1286              | -1121.5538                            | -1121.1303              | -1121.5926                            |
| Ph               |           |                       | -479.3690 | -479.8357             |                         |                                       | -1194.9261              | -1195.3901                            |
| OMe              | -362.8209 | -363.2094             | -362.8308 | -363.2998             | -1078.3888              | -1078.8160                            | -1078.3939              | -1078.8587                            |
| NH <sub>2</sub>  | -303.6550 | -304.0537             | -303.6718 | -304.1437             | -1019.2238              | -1019.6584                            | -1019.2375              | -1019.7122                            |
| NMe <sub>2</sub> | -382.2714 | -382.6765             | -382.2818 | -382.7588             | -1097.8395              | -1098.2792                            | -1097.8450              | -1098.3180                            |

**Table S1:** Total energies (in a.u.) of neutral and protonated pyridines and Me<sub>4</sub>BTPs in the gas phase and in PCM – water. B3LYP/6-31G(d,p) calculations.

| R                             | Yb(L) <sub>3</sub> <sup>3+</sup> | Eu(L) <sub>3</sub> <sup>3+</sup> | Eu(L) <sub>3</sub> <sup>3+</sup> PCM | La(L) <sub>3</sub> <sup>3+</sup> | Eu(NO <sub>3</sub> ) <sub>3</sub> (L) | La(NO <sub>3</sub> ) <sub>3</sub> (L) |
|-------------------------------|----------------------------------|----------------------------------|--------------------------------------|----------------------------------|---------------------------------------|---------------------------------------|
| Cl                            | -4309.3189                       | -4305.2255                       | -4305.5723                           | -4301.4986                       | -2299.9692                            | -2296.2397                            |
| F                             | -3228.2443                       | -3224.1509                       |                                      | -3220.4241                       | -1939.6113                            | -1935.8819                            |
| H                             | -2930.5654                       | -2926.4718                       |                                      | -2922.7448                       | -1840.3815                            | -1836.6521                            |
| Me                            | -3048.5427                       | -3044.4491                       |                                      | -3040.7221                       | -1879.7042                            | -1875.9747                            |
| <sup>t</sup> But              | -3402.3827                       | -3398.2891                       |                                      | -3394.5620                       | -1997.6485                            | -1993.9191                            |
| C <sub>6</sub> H <sub>6</sub> | /                                | /                                |                                      | /                                | -2071.4419                            | -2067.7125                            |
| OMe                           | -3274.1683                       | -3270.0747                       |                                      | -3266.3476                       | -1954.9102                            | -1951.1807                            |
| NH <sub>2</sub>               | -3096.6946                       | -3092.6040                       |                                      | -3088.8738                       | -1895.7482                            | -1892.0187                            |
| NMe <sub>2</sub>              | -3332.5534                       | -3328.4597                       | -3328.7672                           | -3324.7324                       | -1974.3644                            | -1970.6348                            |

**Table S2:** Total Energies (in a.u.) of the 1:3 and 1:1 complexes. L= R-substituted Me<sub>4</sub>BTP. B3LYP/6-31G(d,p) calculations.

|                               | Eu-N <sub>1</sub> | Eu-N <sub>2</sub> | qN <sub>1</sub> | qN <sub>2</sub> | qEu  | La-N <sub>1</sub> | La-N <sub>2</sub> | qN <sub>1</sub> | qN <sub>2</sub> | qLa  |
|-------------------------------|-------------------|-------------------|-----------------|-----------------|------|-------------------|-------------------|-----------------|-----------------|------|
| Cl                            | 2.68              | 2.63              | -0.55           | -0.38           | 1.38 | 2.82              | 2.71              | -0.55           | -0.38           | 1.48 |
| F                             | 2.68              | 2.63              | -0.55           | -0.38           | 1.38 | 2.82              | 2.71              | -0.56           | -0.38           | 1.48 |
| H                             | 2.69              | 2.62              | -0.55           | -0.38           | 1.37 | 2.82              | 2.71              | -0.55           | -0.39           | 1.48 |
| Me                            | 2.67              | 2.62              | -0.56           | -0.38           | 1.37 | 2.81              | 2.71              | -0.57           | -0.39           | 1.48 |
| <sup>t</sup> But              | 2.66              | 2.62              | -0.57           | -0.38           | 1.37 | 2.80              | 2.71              | -0.56           | -0.39           | 1.48 |
| C <sub>6</sub> H <sub>6</sub> | 2.67              | 2.62              | -0.56           | -0.38           | 1.37 | 2.81              | 2.71              | -0.56           | -0.39           | 1.48 |
| OMe                           | 2.66              | 2.62              | -0.58           | -0.38           | 1.37 | 2.80              | 2.71              | -0.57           | -0.39           | 1.48 |
| NH <sub>2</sub>               | 2.65              | 2.62              | -0.59           | -0.38           | 1.37 | 2.78              | 2.71              | -0.59           | -0.39           | 1.48 |

|                  |      |      |       |       |      |      |      |       |       |      |
|------------------|------|------|-------|-------|------|------|------|-------|-------|------|
| NMe <sub>2</sub> | 2.64 | 2.62 | -0.60 | -0.38 | 1.37 | 2.78 | 2.70 | -0.60 | -0.39 | 1.48 |
|------------------|------|------|-------|-------|------|------|------|-------|-------|------|

**Table S3:** Optimized Ln(NO<sub>3</sub>)<sub>3</sub>(R-BTP) complexes (Ln = Eu; La). Distances (Å) and Mulliken charges q (in e).

|                  | Yb                |                   | Eu                |                   | La                |                   |
|------------------|-------------------|-------------------|-------------------|-------------------|-------------------|-------------------|
|                  | Yb-N <sub>1</sub> | Yb-N <sub>2</sub> | Eu-N <sub>1</sub> | Eu-N <sub>2</sub> | La-N <sub>1</sub> | La-N <sub>2</sub> |
| Cl               | 2.54              | 2.56              | 2.62              | 2.63              | 2.73              | 2.71              |
| F                | 2.54              | 2.56              | 2.62              | 2.63              | 2.73              | 2.71              |
| H                | 2.54              | 2.56              | 2.62              | 2.62              | 2.74              | 2.71              |
| Me               | 2.53              | 2.56              | 2.62              | 2.63              | 2.73              | 2.71              |
| <sup>t</sup> But | 2.53              | 2.56              | 2.61              | 2.62              | 2.73              | 2.71              |
| OMe              | 2.53              | 2.65              | 2.61              | 2.63              | 2.72              | 2.71              |
| NH <sub>2</sub>  | 2.52              | 2.57              | 2.60              | 2.63              | 2.71              | 2.72              |
| NMe <sub>2</sub> | 2.51              | 2.56              | 2.59              | 2.63              | 2.70              | 2.72              |

**Table S4:** QM optimized Ln(R-BTP)<sub>3</sub><sup>3+</sup> complexes. Distances (Å).

|                  | Yb             |                |      | Eu             |                |      | La             |                |      |
|------------------|----------------|----------------|------|----------------|----------------|------|----------------|----------------|------|
|                  | N <sub>1</sub> | N <sub>2</sub> | Yb   | N <sub>1</sub> | N <sub>2</sub> | Eu   | N <sub>1</sub> | N <sub>2</sub> | La   |
| Cl               | -0.59          | -0.40          | 1.55 | -0.59          | -0.41          | 1.57 | -0.60          | -0.42          | 1.67 |
| F                | -0.59          | -0.40          | 1.55 | -0.60          | -0.41          | 1.57 | -0.61          | -0.42          | 1.67 |
| H                | -0.58          | -0.40          | 1.54 | -0.59          | -0.41          | 1.57 | -0.59          | -0.42          | 1.67 |
| Me               | -0.59          | -0.40          | 1.54 | -0.60          | -0.41          | 1.57 | -0.61          | -0.42          | 1.67 |
| <sup>t</sup> But | -0.60          | -0.40          | 1.54 | -0.61          | -0.41          | 1.57 | -0.61          | -0.42          | 1.66 |
| OMe              | -0.61          | -0.39          | 1.55 | -0.62          | -0.40          | 1.57 | -0.63          | -0.42          | 1.67 |
| NH <sub>2</sub>  | -0.62          | -0.39          | 1.55 | -0.63          | -0.40          | 1.57 | -0.64          | -0.42          | 1.66 |
| NMe <sub>2</sub> | -0.64          | -0.39          | 1.54 | -0.64          | -0.40          | 1.56 | -0.65          | -0.42          | 1.66 |

**Table S5:** QM optimized Ln (R-BTP)<sub>3</sub><sup>3+</sup> complexes. Mulliken charges (e).

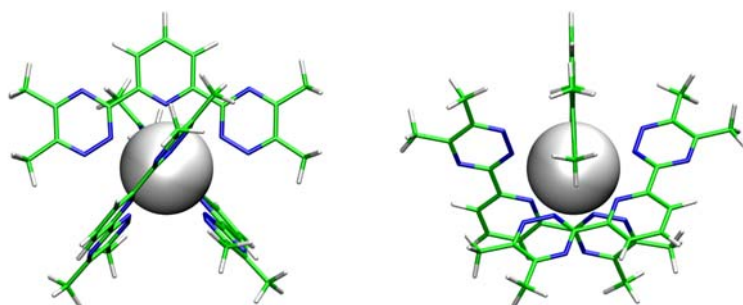

$\text{La}(\text{H-BTP})_3^{3+}$

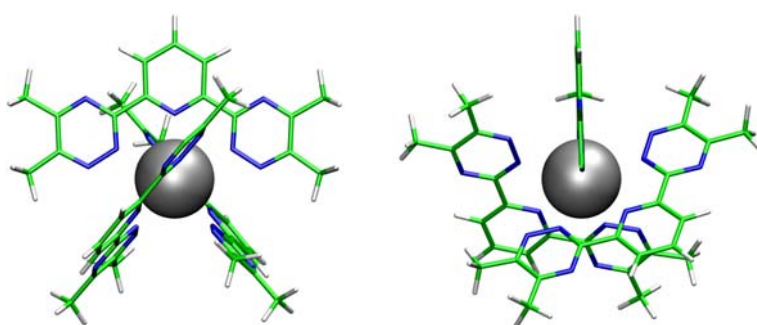

$\text{Eu}(\text{H-BTP})_3^{3+}$

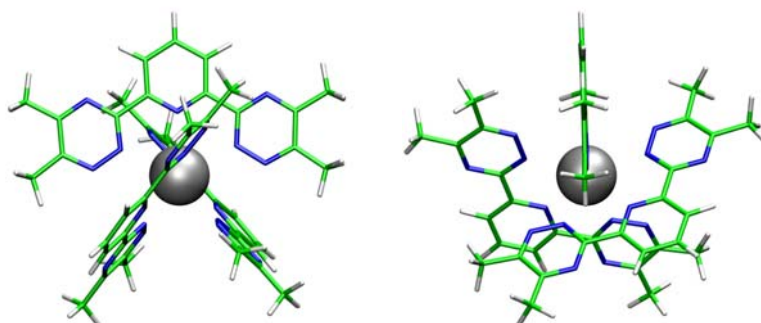

$\text{Yb}(\text{H-BTP})_3^{3+}$

**Figure S1:** Optimized  $\text{Ln}(\text{H-BTP})_3^{3+}$  complexes (orthogonal views).
